# Supplementary material
Source: Research Square preprint supplement (doi:10.21203/rs.3.rs-10320326/v1)
Supplement: Supplementary file 1 [file 8cfddce96f85f701aac0dfae.docx]

**Appendix A: Identification Diagnostics**

*Assessing Causal Identification Assumptions in the NAM-PD Panel Model*

**A.1 Nickell Bias**

Dynamic panel models that include both country fixed effects and a lagged dependent variable produce biased autoregressive coefficients of order *O*(1/*T*) (Nickell, 1981). With a mean panel length of *T̄* = 30.9 years (minimum 15 years; maximum 31 years), the implied bias is 1/*T̄* ≈ 0.032 — approximately 3.2 percentage points of downward pressure on the AR coefficient. This is below the threshold that would motivate Arellano-Bond GMM correction; at *N* = 176, Arellano-Bond would itself introduce weak-instrument concerns. The Nickell bias is therefore acknowledged but treated as a minor second-order issue in this panel.

**A.2 Between-vs-Within Variance Decomposition**

Fixed effects and first-difference estimators recover causal effects only from **within-country** temporal variation. The ratio of between-country to within-country standard deviation (B/W) signals how much identifying variation survives after country demeaning. Table A1 reports this decomposition for all six predictors.

**Table A1.** Between-vs-within variance decomposition (N = 176 countries, 1995–2025).

| **Variable** | **Overall σ** | **Between σ** | **Within σ** | **B/W ratio** | **FE identification** |
| --- | --- | --- | --- | --- | --- |
| **DESTA depth (mar_typedepth)** | 1.737 | 1.291 | 1.178 | 1.10 | Good |
| **FDI (signed log1p)** | 1.054 | 0.604 | 0.873 | 0.69 | Good |
| **Diplomatic visits (COLT)** | 25.93 | 22.64 | 12.70 | 1.78 | Moderate |
| **Conflict intensity (PRIO)** | 0.352 | 0.184 | 0.300 | 0.61 | Good |
| **Migration stock (%)** | 12.50 | 12.29 | 2.34 | 5.26 | Poor — IV needed |
| **Democracy level AR (v2x_polyarchy)** | 0.264 | 0.252 | 0.080 | 3.14 | Nuisance term |

**Key finding:** Migration stock has a B/W ratio of 5.26, making it effectively a time-invariant country characteristic in this 31-year panel. No within-estimator — fixed effects, first differences, or DML-FE — can credibly identify the causal effect of migration on democratic velocity from the current data; an external instrument operating through within-country temporal variation would be required. DESTA (B/W = 1.10) and FDI (B/W = 0.69) retain substantial within-country identifying variation and are better suited to panel causal designs.

**A.3 Reverse Causation Diagnostic (DESTA)**

Cross-sectional evidence confirms that more democratic countries systematically sign deeper trade agreements: countries in the highest democracy quartile have a mean DESTA depth of 5.16 versus 4.48 for countries in the lowest quartile (gap = +0.68 depth units). This reflects *structural* selection. The more policy-relevant question is whether *increases* in democratic quality dynamically predict subsequent treaty deepening — i.e., reverse causation in the temporal dimension. The correlation between lagged democracy levels and next-year DESTA depth change is − 0.047 (lag 1) and − 0.059 (lag 2). These are substantively small and negative, providing no evidence of forward-looking democratic selection into treaty depth within the panel. The directional assumption — treaty depth shapes democratic velocity rather than vice versa — is empirically defensible in the temporal dimension.

**A.4 Double Machine Learning: Why It Does Not Apply Here**

Double Machine Learning (DML; Chernozhukov et al., 2018) estimates the parameter θ in the partially linear model *Y = θD + g(X, W) + ε* by cross-fitting flexible ML nuisance functions for *E*[*Y* | *X*] and *E*[*D* | *X*] and partialling out their predictions (Robinson, 1988). DML is the correct tool when the primary identification threat is **high-dimensional observable confounding** and the conditional unconfoundedness assumption — *Y*(*d*) ⊥ *D* | *X* — is plausibly satisfied.

In the present data, the dominant identification threat is **selection on time-invariant unobservables**: colonial history, legal tradition, geographic proximity to democratic blocs, and state-capacity trajectories jointly predict both treaty depth and democratic trajectories but are absent from *X*. Conditioning on the five observable predictors in the NAM-PD does not make DESTA treatment assignment conditionally random. DML partialling on observables cannot remove bias from unobserved structural confounders.

The appropriate next identification step for the DESTA effect is a **staggered difference-in-differences** design exploiting treaty entry-into-force timing (Callaway & Sant'Anna, 2021; Sun & Abraham, 2021). The existing data contain 251 depth-increase transitions across 146 of 176 panel countries — sufficient quasi-experimental variation for a credible causal extension, subject to the parallel-trends assumption on pre-treatment democratic velocity trajectories.

**Summary: Identification Diagnostic Checklist**

| **Diagnostic** | **Result** | **Status** |
| --- | --- | --- |
| **Nickell bias (1/T̄)** | 0.032 at T̄ = 30.9 | Acceptable — no GMM correction needed |
| **DESTA between/within ratio** | 1.10 | Sufficient within-country variation for panel ID |
| **Migration between/within ratio** | 5.26 | Effectively cross-sectional — IV required |
| **Reverse causation (DESTA, lag 2)** | r = − 0.059 | Weak — directional assumption defensible |
| **Conditional unconfoundedness (DML prerequisite)** | Not satisfied | Structural unobservables dominate — DML insufficient |
| **Staggered DiD feasibility (DESTA)** | 251 transitions, 146 countries | Feasible — recommended causal extension |
| **Overall identification strategy** | Predictive framing | Correct given available data |

**References**

Callaway, B., & Sant'Anna, P. H. C. (2021). Difference-in-differences with multiple time periods. *Journal of Econometrics*, 225(2), 200–230.

Chernozhukov, V., Chetverikov, D., Demirer, M., Duflo, E., Hansen, C., Newey, W., & Robins, J. (2018). Double/debiased machine learning for treatment and structural parameters. *The Econometrics Journal*, 21(1), C1–C68.

Nickell, S. (1981). Biases in dynamic models with fixed effects. *Econometrica*, 49(6), 1417–1426.

Robinson, P. M. (1988). Root-*N*-consistent semiparametric regression. *Econometrica*, 56(4), 931–954.

Sun, L., & Abraham, S. (2021). Estimating dynamic treatment effects in event studies with heterogeneous treatment effects. *Journal of Econometrics*, 225(2), 175–199.
